# Supplementary material
Source: MDPI journal article supplement (https://www.mdpi.com/2071-1050/10/7/2309)
Supplement: s1 [file s1]

## Supplementary materials

**Table S 1.** Criteria for risk levels of each assessed social indicators defined in PSILCA

| Subcategory                          | Indicators                                     | Unit                                                                                                                               |                  | Risk level |          |          |                |                |           | Reference for indicator definition |
|--------------------------------------|------------------------------------------------|------------------------------------------------------------------------------------------------------------------------------------|------------------|------------|----------|----------|----------------|----------------|-----------|------------------------------------|
|                                      |                                                |                                                                                                                                    |                  | No risk    | Very low | Low      | Medium         | High           | Very high |                                    |
| Contribution to economic development | Public spending on education                   | % of GDP                                                                                                                           |                  |            | 10+      | 7.5-10   | 5-7.5          | 2.5-5          | 0-2.5     |                                    |
| Health and safety                    | Health expenditure                             | % of GDP                                                                                                                           |                  |            | 15+      | 10-15    | 5-10           | 2.5-5          | 0-2.5     |                                    |
| Fair salary                          | Living wage per month                          | USD                                                                                                                                |                  |            | <100     | 100-200  | 200-500        | 500-1000       | 1000+     |                                    |
|                                      | Minimum wage per month (no data)               | USD                                                                                                                                |                  |            | 1000+    | 500-1000 | 300-500        | 200-300        | <200      |                                    |
|                                      | Minimum wage per month (data available)        | Liv. wage / Min. wage                                                                                                              | Min wage >300USD |            | <0.5     | 0.5-0.9  | 0.9-1.3        | 1.3-1.8        | 1.8+      |                                    |
|                                      |                                                |                                                                                                                                    | Min wage <300USD |            |          |          | 0.5-0.9        | 0.9-1.3        | 1.3-1.8   |                                    |
|                                      | Sector average wage per months                 | Salary / Liv. Wage or Salary / Min. wage                                                                                           |                  |            | 2.5+     | 2-2.5    | 1.5-2          | 1-1.5          | 0-1       |                                    |
| Forced labor                         | Goods produced by the forced labor             | #                                                                                                                                  |                  | 0          | 1        | 2        | 3-4            | 5-6            | 7+        | [1]                                |
|                                      | Trafficking in persons                         | Tier# and text                                                                                                                     |                  | -          | 1        | -        | 2              | 2 watch list   | 3         | [2]                                |
| Working time                         | Weekly hours of work per employee              | hours                                                                                                                              |                  |            |          | 40-48    | 30-40 or 48-55 | 20-30 or 55-60 | 60+       |                                    |
| Respect of indigenous rights         | Presence of Indigenous population              | Yes/No                                                                                                                             |                  | No         | -        | -        | Yes            | -              | -         |                                    |
|                                      | Human rights issues faced by indigenous people | Pts (based on ratification of ILO convention No.169 (1pt), availability of UN report on the rights of indigenous people (1pt), and |                  | -          | 5        | 4        | 3              | 2              | 1 or 0    | [3–5]                              |

|  |  |                                      |  |  |  |  |  |  |  |
|--|--|--------------------------------------|--|--|--|--|--|--|--|
|  |  | adoption of UN-DESA 2007 (max 3pts)) |  |  |  |  |  |  |  |
|--|--|--------------------------------------|--|--|--|--|--|--|--|

**Table S 2.** Results of data uncertainty analysis for selecting social indicators for further assessments.

| Impact indicators                                                              | green concrete {CH} |   |   |   |   | green concrete {DE} |   |   |   |   | green concrete {JP} |   |   |   |   | green concrete {SE} |   |   |   |   | green concrete {TH} |   |   |   |   | green concrete {US} |   |   |   |   |
|--------------------------------------------------------------------------------|---------------------|---|---|---|---|---------------------|---|---|---|---|---------------------|---|---|---|---|---------------------|---|---|---|---|---------------------|---|---|---|---|---------------------|---|---|---|---|
|                                                                                | R                   | C | T | G | F | R                   | C | T | G | F | R                   | C | T | G | F | R                   | C | T | G | F | R                   | C | T | G | F | R                   | C | T | G | F |
| Active involvement of enterprises in corruption and bribery                    | 2                   | 2 | 2 | 2 | 3 | 3                   | 3 | 3 | 3 | 4 | 3                   | 3 | 3 | 2 | 4 | 2                   | 2 | 2 | 2 | 3 | 5                   | 5 | 5 | 5 | 5 | 2                   | 2 | 2 | 2 | 3 |
| Anti-competitive behaviour or violation of anti-trust and monopoly legislation | 3                   | 3 | 5 | 3 | 3 | 4                   | 4 | 5 | 4 | 4 | 4                   | 4 | 5 | 4 | 4 | 4                   | 4 | 5 | 3 | 4 | 4                   | 4 | 5 | 4 | 4 | 2                   | 2 | 5 | 2 | 2 |
| Association and bargaining rights                                              | 4                   | 4 | 5 | 3 | 5 | 2                   | 3 | 4 | 1 | 4 | 2                   | 3 | 4 | 1 | 4 | 2                   | 3 | 4 | 1 | 4 | 4                   | 4 | 5 | 3 | 4 | 2                   | 3 | 4 | 1 | 3 |
| Biomass consumption                                                            | 2                   | 1 | 4 | 1 | 1 | 2                   | 1 | 4 | 1 | 1 | 2                   | 1 | 4 | 1 | 1 | 2                   | 1 | 4 | 1 | 1 | 2                   | 1 | 4 | 1 | 1 | 2                   | 1 | 4 | 1 | 1 |
| Certified environmental management system                                      | 2                   | 1 | 2 | 1 | 2 | 2                   | 1 | 2 | 1 | 2 | 2                   | 1 | 2 | 1 | 2 | 2                   | 1 | 2 | 1 | 2 | 2                   | 1 | 2 | 1 | 2 | 2                   | 1 | 2 | 1 | 2 |
| Child Labour, female                                                           | 3                   | 3 | 4 | 2 | 5 | 3                   | 3 | 4 | 2 | 5 | 3                   | 3 | 5 | 2 | 5 | 4                   | 4 | 5 | 3 | 5 | 2                   | 2 | 5 | 1 | 5 | 2                   | 2 | 4 | 1 | 5 |
| Child Labour, male                                                             | 2                   | 2 | 4 | 2 | 5 | 2                   | 2 | 4 | 1 | 5 | 3                   | 3 | 5 | 2 | 5 | 3                   | 3 | 5 | 3 | 5 | 2                   | 2 | 5 | 1 | 5 | 2                   | 2 | 4 | 1 | 5 |
| Child Labour, total                                                            | 2                   | 2 | 4 | 2 | 4 | 2                   | 1 | 4 | 1 | 4 | 3                   | 2 | 5 | 2 | 4 | 3                   | 3 | 5 | 3 | 4 | 2                   | 1 | 5 | 1 | 4 | 2                   | 1 | 4 | 1 | 4 |
| DALYs due to indoor and outdoor air and water pollution                        | 2                   | 1 | 5 | 1 | 4 | 2                   | 1 | 5 | 1 | 4 | 2                   | 1 | 5 | 1 | 4 | 2                   | 1 | 5 | 1 | 4 | 2                   | 1 | 5 | 1 | 4 | 2                   | 1 | 5 | 1 | 4 |
| Drinking water coverage                                                        | 2                   | 2 | 3 | 1 | 1 | 2                   | 2 | 3 | 1 | 1 | 2                   | 2 | 3 | 1 | 1 | 2                   | 2 | 3 | 1 | 1 | 2                   | 2 | 3 | 1 | 1 | 2                   | 2 | 3 | 1 | 1 |
| Education                                                                      | 2                   | 1 | 3 | 1 | 1 | 2                   | 1 | 3 | 1 | 1 | 2                   | 2 | 3 | 2 | 1 | 2                   | 2 | 4 | 1 | 1 | 2                   | 2 | 3 | 1 | 1 | 2                   | 1 | 4 | 1 | 1 |
| Fair Salary                                                                    | 2                   | 1 | 4 | 1 | 2 | 2                   | 2 | 3 | 1 | 2 | 2                   | 2 | 4 | 1 | 2 | 2                   | 1 | 4 | 1 | 2 | 2                   | 1 | 4 | 1 | 2 | 2                   | 2 | 2 | 1 | 2 |
| Fatal accidents                                                                | 2                   | 3 | 5 | 1 | 3 | 2                   | 3 | 5 | 1 | 3 | 4                   | 4 | 5 | 4 | 4 | 2                   | 3 | 3 | 1 | 2 | 3                   | 4 | 4 | 2 | 3 | 3                   | 4 | 4 | 2 | 3 |
| Fossil fuel consumption                                                        | 4                   | 5 | 5 | 3 | 3 | 2                   | 5 | 4 | 1 | 1 | 2                   | 5 | 4 | 1 | 1 | 2                   | 5 | 4 | 1 | 1 | 2                   | 5 | 4 | 1 | 1 | 2                   | 5 | 4 | 1 | 1 |
| Frequency of forced labour                                                     | 2                   | 4 | 3 | 3 | - | 2                   | 4 | 3 | 3 | - | 2                   | 4 | 3 | 3 | - | 2                   | 4 | 3 | 3 | - | 2                   | 4 | 3 | 3 | - | 2                   | 4 | 3 | 3 | - |
| Gender wage gap                                                                | 3                   | 1 | 4 | 1 | 2 | 3                   | 1 | 3 | 1 | 2 | 3                   | 1 | 4 | 1 | 3 | 3                   | 1 | 4 | 1 | 2 | 3                   | 1 | 3 | 1 | 2 | 3                   | 1 | 5 | 1 | 3 |
| Goods produced by forced labour                                                | 2                   | 4 | 1 | 1 | 2 | 2                   | 4 | 1 | 1 | 2 | 2                   | 4 | 1 | 1 | 3 | 2                   | 4 | 1 | 1 | 2 | 2                   | 4 | 1 | 1 | 3 | 2                   | 4 | 1 | 1 | 2 |
| Health expenditure                                                             | 2                   | 1 | 3 | 1 | 1 | 2                   | 1 | 3 | 1 | 1 | 2                   | 1 | 3 | 1 | 1 | 2                   | 1 | 3 | 1 | 1 | 2                   | 1 | 3 | 1 | 1 | 3                   | 2 | 3 | 2 | 2 |
| Illiteracy, female                                                             | 2                   | 2 | 5 | 1 | 1 | 2                   | 2 | 5 | 1 | 1 | 2                   | 2 | 4 | 2 | 1 | 2                   | 2 | 4 | 1 | 1 | 2                   | 2 | 4 | 1 | 1 | 2                   | 2 | 3 | 2 | 1 |
| Illiteracy, male                                                               | 2                   | 2 | 5 | 1 | 1 | 2                   | 2 | 5 | 1 | 1 | 2                   | 2 | 4 | 2 | 1 | 2                   | 2 | 5 | 1 | 1 | 2                   | 2 | 4 | 1 | 1 | 2                   | 2 | 3 | 2 | 1 |
| Illiteracy, total                                                              | 2                   | 2 | 5 | 1 | 1 | 2                   | 2 | 5 | 1 | 1 | 2                   | 2 | 4 | 1 | 1 | 2                   | 2 | 5 | 1 | 1 | 2                   | 2 | 4 | 1 | 1 | 2                   | 2 | 3 | 2 | 1 |
| Indigenous rights                                                              | 3                   | 1 | 3 | 1 | 1 | 3                   | 1 | 3 | 1 | 1 | 3                   | 1 | 3 | 1 | 1 | 3                   | 1 | 3 | 1 | 1 | 3                   | 1 | 3 | 1 | 1 | 3                   | 1 | 2 | 1 | 1 |
| Industrial water depletion                                                     | 2                   | 2 | 5 | 2 | 2 | 2                   | 2 | 5 | 1 | 1 | 2                   | 2 | 5 | 2 | 2 | 2                   | 2 | 5 | 1 | 1 | 2                   | 2 | 5 | 1 | 1 | 2                   | 2 | 5 | 1 | 1 |
| International migrant stock                                                    | 2                   | 1 | 2 | 1 | - | 2                   | 1 | 2 | 1 | 5 | 2                   | 1 | 2 | 1 | 5 | 2                   | 1 | 2 | 1 | 5 | 2                   | 1 | 2 | 1 | 5 | 2                   | 1 | 2 | 1 | 5 |
| International migrant workers (in the sector/ site)                            | 2                   | 3 | 5 | 2 | 2 | 5                   | 5 | 5 | 4 | 5 | 3                   | 4 | 5 | 3 | 3 | 2                   | 3 | 5 | 2 | 2 | 2                   | 3 | 5 | 1 | 2 | 5                   | 5 | 5 | 5 | 5 |
| Minerals consumption                                                           | 3                   | 2 | 4 | 2 | 2 | 2                   | 1 | 4 | 1 | 1 | 2                   | 1 | 4 | 1 | 1 | 2                   | 1 | 4 | 1 | 1 | 2                   | 1 | 4 | 1 | 1 | 2                   | 1 | 4 | 1 | 1 |
| Net migration                                                                  | 2                   | 1 | 1 | 1 | - | 2                   | 1 | 1 | 1 | - | 2                   | 1 | 1 | 1 | - | 2                   | 1 | 1 | 1 | - | 2                   | 1 | 1 | 1 | - | 2                   | 1 | 1 | 1 | - |
| Non-fatal accidents                                                            | 2                   | 3 | 4 | 1 | 2 | 2                   | 3 | 4 | 1 | 3 | 5                   | 5 | 5 | 5 | 5 | 2                   | 3 | 3 | 1 | 2 | 3                   | 3 | 3 | 2 | 3 | 2                   | 3 | 4 | 2 | 3 |
| Pollution                                                                      | 3                   | 3 | 2 | 1 | 1 | 3                   | 3 | 2 | 1 | 1 | 3                   | 3 | 2 | 1 | 1 | 3                   | 3 | 2 | 1 | 1 | 3                   | 3 | 2 | 1 | 1 | 3                   | 3 | 2 | 1 | 1 |
| Public sector corruption                                                       | 2                   | 1 | 3 | 1 | - | 2                   | 1 | 3 | 1 | - | 2                   | 1 | 3 | 1 | - | 2                   | 1 | 3 | 1 | - | 2                   | 1 | 3 | 1 | - | 2                   | 1 | 3 | 1 | - |
| Safety measures                                                                | 2                   | 4 | 1 | 3 | 2 | 2                   | 4 | 1 | 3 | 2 | 2                   | 4 | 1 | 3 | 2 | 2                   | 4 | 1 | 3 | 2 | 2                   | 4 | 1 | 5 | 2 | 2                   | 4 | 1 | 1 | 2 |

|                                               |   |   |   |   |   |   |   |   |   |   |   |   |   |   |   |   |   |   |   |   |   |   |   |   |   |   |   |   |   |   |
|-----------------------------------------------|---|---|---|---|---|---|---|---|---|---|---|---|---|---|---|---|---|---|---|---|---|---|---|---|---|---|---|---|---|---|
| Sanitation coverage                           | 2 | 2 | 3 | 1 | 1 | 2 | 2 | 3 | 1 | 1 | 2 | 2 | 3 | 1 | 1 | 2 | 2 | 3 | 1 | 1 | 2 | 2 | 3 | 1 | 1 | 2 | 2 | 3 | 1 | 1 |
| Social security expenditures                  | 2 | 1 | 5 | 1 | 4 | 2 | 1 | 5 | 1 | 4 | 2 | 1 | 4 | 1 | 4 | 2 | 1 | 5 | 1 | 4 | 2 | 1 | 4 | 1 | 4 | 2 | 1 | 5 | 1 | 4 |
| Trade unionism                                | 2 | 3 | 4 | 1 | 4 | 2 | 3 | 5 | 1 | 4 | 2 | 3 | 3 | 1 | 4 | 2 | 3 | 4 | 1 | 4 | 2 | 3 | 4 | 1 | 4 | 2 | 3 | 2 | 1 | 4 |
| Trafficking in persons                        | 2 | 1 | 1 | 1 | 4 | 2 | 1 | 1 | 1 | 4 | 2 | 1 | 1 | 1 | 4 | 2 | 1 | 1 | 1 | 4 | 2 | 1 | 1 | 1 | 4 | 2 | 1 | 1 | 1 | 4 |
| Unemployment                                  | 3 | 3 | 3 | 3 | 3 | 4 | 3 | 4 | 3 | 3 | 5 | 5 | 5 | 5 | 5 | 3 | 2 | 3 | 2 | 2 | 3 | 2 | 2 | 3 | 2 | 2 | 5 | 5 | 5 | 5 |
| Violations of employment laws and regulations | 2 | 1 | 1 | 5 | 2 | 2 | 1 | 1 | 5 | 2 | 2 | 1 | 1 | 5 | 2 | 2 | 1 | 1 | 5 | 2 | 2 | 1 | 1 | 5 | 2 | 2 | 1 | 1 | 1 | 2 |
| Weekly hours of work per employee             | 2 | 3 | 3 | 1 | 3 | 2 | 4 | 3 | 1 | 3 | 2 | 4 | 3 | 1 | 3 | 2 | 3 | 3 | 1 | 3 | 2 | 4 | 3 | 1 | 4 | 2 | 4 | 2 | 1 | 4 |
| Workers affected by natural disasters         | 2 | 1 | 2 | 1 | 4 | 2 | 1 | 2 | 1 | 4 | 2 | 1 | 2 | 1 | 4 | 2 | 1 | 2 | 1 | 4 | 2 | 1 | 2 | 1 | 4 | 2 | 1 | 2 | 1 | 4 |
| Youth illiteracy, female                      | 2 | 2 | 5 | 1 | 1 | 2 | 2 | 5 | 1 | 1 | 2 | 2 | 4 | 2 | 1 | 2 | 2 | 5 | 1 | 1 | 2 | 2 | 4 | 1 | 1 | 2 | 2 | 3 | 3 | 1 |
| Youth illiteracy, male                        | 2 | 2 | 5 | 1 | 1 | 2 | 2 | 5 | 1 | 1 | 2 | 2 | 4 | 2 | 1 | 2 | 2 | 4 | 2 | 1 | 2 | 2 | 4 | 1 | 1 | 2 | 2 | 3 | 3 | 1 |
| Youth illiteracy, total                       | 2 | 2 | 5 | 1 | 1 | 2 | 2 | 5 | 1 | 1 | 2 | 2 | 4 | 2 | 1 | 2 | 2 | 5 | 1 | 1 | 2 | 2 | 4 | 1 | 1 | 2 | 2 | 3 | 3 | 1 |

Each letter represents the indicators for the pedigree matrix to assess the data quality: R reliability of the sources, C completeness conformance, T temporal conformance, G geographical conformance, and F further technical conformance. Values 1 to 5 represents the quality of the data, where 1 is the best and 5 is the worst. Each value has specific criteria for the assignment of the value. “-” sign represents non-availability of the data. Social indicators with 5 or - are highlighted.

## References

1. United States Department of Labor, Bureau of International Labor Affairs List of Goods Produced by Child Labor or Forced Labor Available online: <https://www.dol.gov/ilab/reports/child-labor/list-of-goods/> (accessed on May 3, 2018).
2. United States Department of State Trafficking in Persons 2014 Available online: <https://www.state.gov/j/tip/rls/tiprpt/2014/226649.htm> (accessed on May 3, 2018).
3. Office of the United Nations High Commissioner for Human Rights Special Rapporteur on the rights of indigenous peoples Available online: <http://www.ohchr.org/EN/Issues/IPeoples/SRIndigenousPeoples/Pages/CountryReports.aspx> (accessed on May 3, 2018).
4. United Nations Declaration United Nations Declaration on the Rights of Indigenous Peoples. *United Nations Gen. Assem.* **2008**, 10, doi:10.1093/icljaj/24.3.577.
5. International Labour Organization *ILO Convention 169 of June 27, 1989: Convention Concerning Indigenous and Tribal Peoples in Independent Countries*; 1989; Vol. 169;.
